# Supplementary material
Source: publisher figshare collection journal article supplement (https://acs.figshare.com/ndownloader/files/11322356)
Supplement: Supplementary file 1 [file 11322356]

## Supporting information

# Encapsulation of curcumin nanoparticles with MMP9-responsive and thermos-sensitive hydrogel improves diabetic wound healing

*Juan Liu<sup>‡</sup>, Zhiqiang Chen<sup>‡</sup>, Jie Wang, , Ruihong Li, Tingting Li, Mingyang Chang, Fang Yan,*

*Yunfang Wang\**

Tissue Engineering Lab, Beijing Institute of Health Service and Transfusion Medicine, Beijing  
100850, China.

\* Address correspondence to: Dr. Y. Wang, Tissue Engineering Lab, Beijing Institute of Health  
Service and Transfusion Medicine. 27, Taiping Road, Haidian District, Beijing, 100850, P.R.China.  
Tel: +86-10-66931545; Email: wangyf1972@gmail.com.

<sup>‡</sup> J.L. and Z.C. contributed equally to this work.

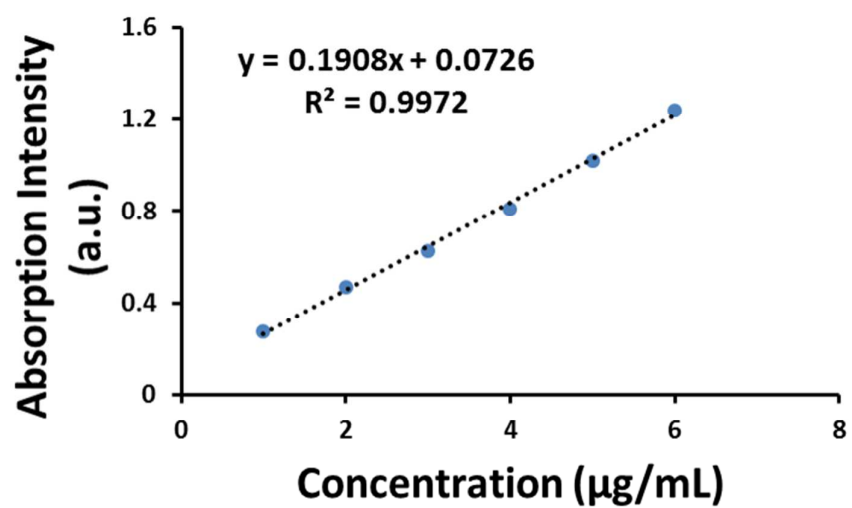

**Figure S1.** Standard curve of free Cur in 80% EtOH by measuring absorbance of samples at a series of concentrations.

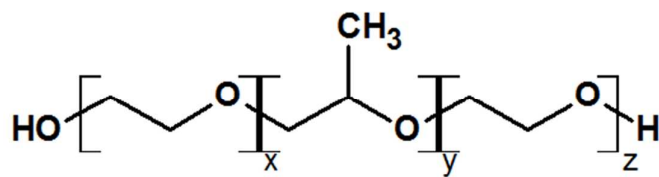

Pluronic F127:  $x=101$ ;  $y=56$ ;  $z=101$ .

Pluronic F68:  $x=80$ ;  $y=27$ ;  $z=80$ .

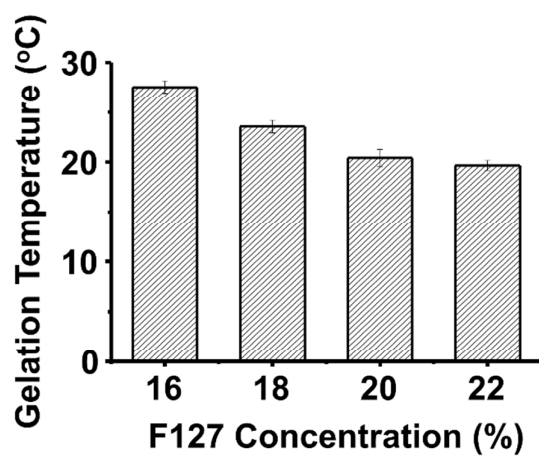

**Figure S2.** Molecular formula of pluronic F127 or F68 and phase-transition temperature of pluronic F127 at different concentrations.

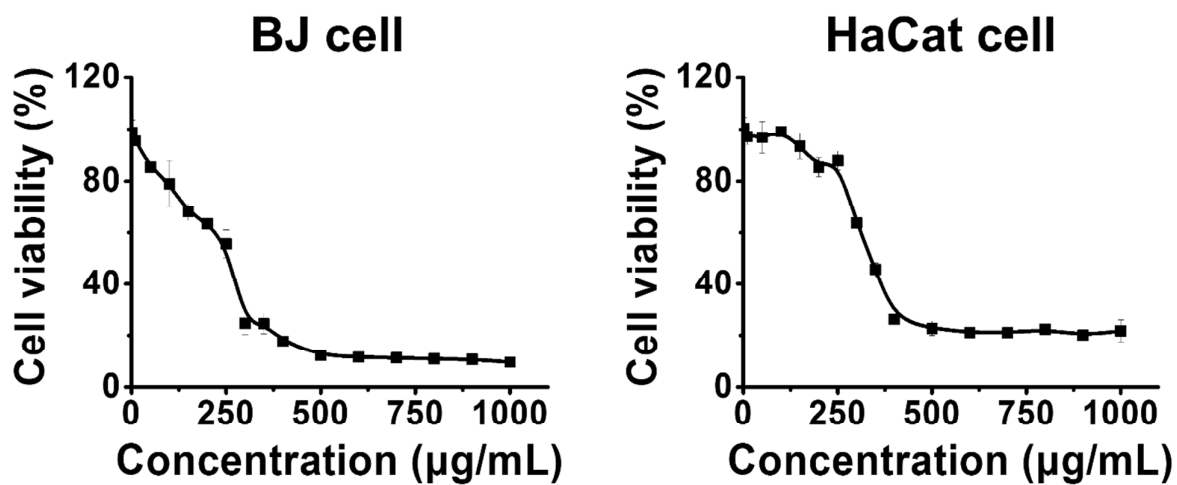

**Figure S3.** Oxidative damage of BJ and HaCat cell by  $\text{H}_2\text{O}_2$ .

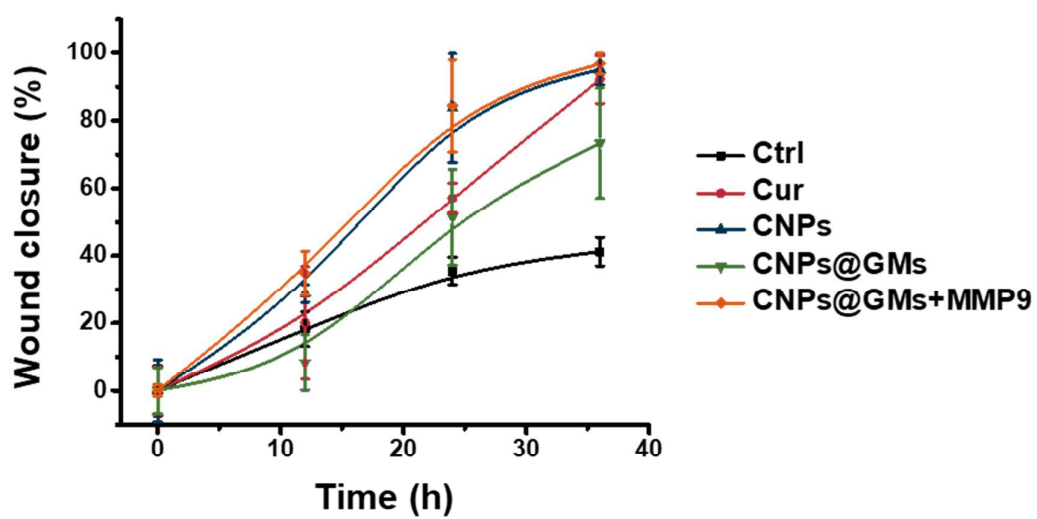

**Figure S4.** The level of wound closure was examined at 0, 12, 24, and 36 h, after scratching the cells.

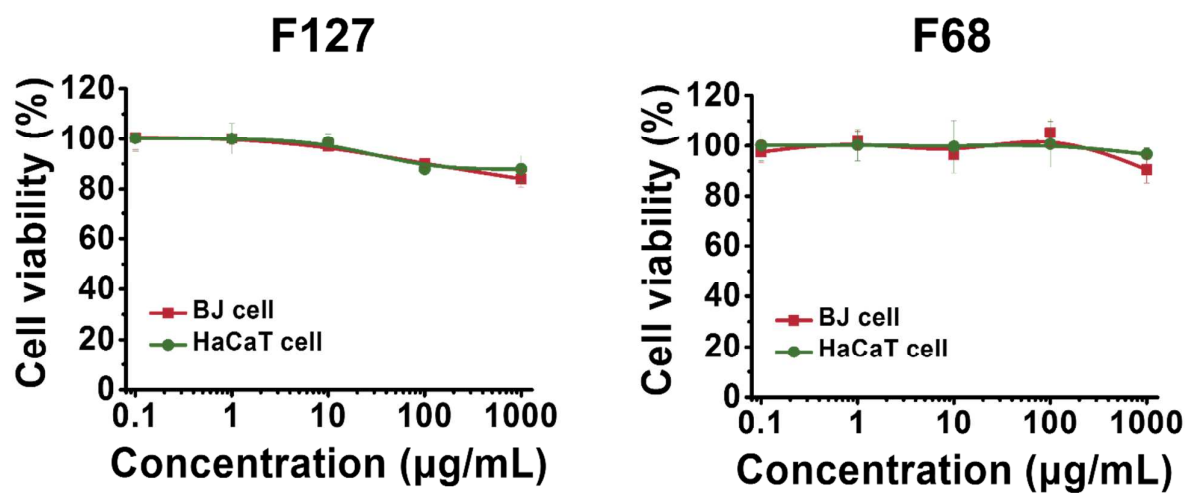

**Figure S5.** Cell viability assays of BJ and HaCat cells with treatment of pluronic F127 and F68.

**Table S1.** Phase-transition temperatures of the mixture solution containing F127 and F68 at different proportions in PBS.

| Proportions |      | F68       |            |            |
|-------------|------|-----------|------------|------------|
|             |      | 3 %       | 6 %        | 9 %        |
| F127        | 18 % | 34.0±1.36 | 39.13±0.58 | 38.30±0.28 |
|             | 20 % | 28.3±0.87 | 32.97±0.52 | 33.27±0.45 |
|             | 22 % | 27.8±0.25 | 28.33±0.71 | 28.90±1.10 |
